# Supplementary material for: Streptozotocin-induced hyperglycemia alters the cecal metabolome and exacerbates antibiotic-induced dysbiosis
Source: PubMed Central journal article supplement — Cell Rep. Author manuscript; Available in PMC 2022 Jan 3. (PMC8722030; doi:10.1016/j.celrep.2021.110113), 2021-12-14
Supplement: NIHMS1764643-supplement-1.pdf [file NIHMS1764643-supplement-1.pdf]

**Cell Reports, Volume 37**

**Supplemental information**

**Streptozotocin-induced hyperglycemia alters  
the cecal metabolome and exacerbates  
antibiotic-induced dysbiosis**

**Jenna I. Wurster, Rachel L. Peterson, Claire E. Brown, Swathi Penumutchu, Douglas V. Guzior, Kerri Neugebauer, William H. Sano, Manu M. Sebastian, Robert A. Quinn, and Peter Belenky**

### A Fasting Blood Glucose

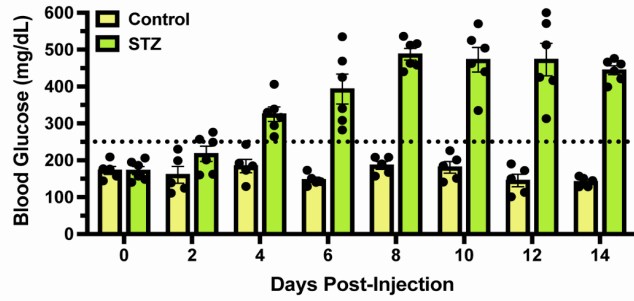

### B Inflammatory Cytokines

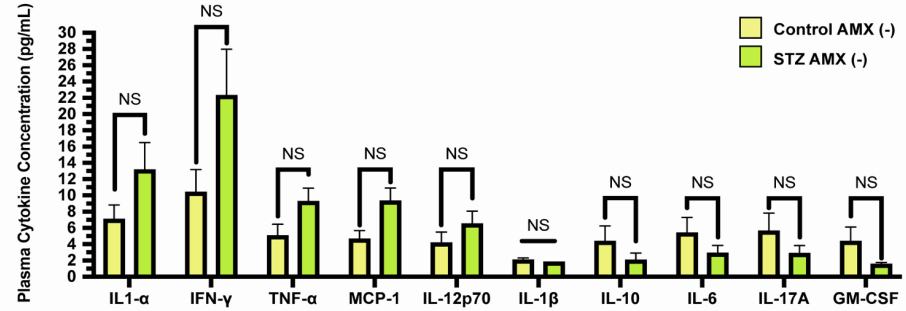

### C Inflammatory Cytokines

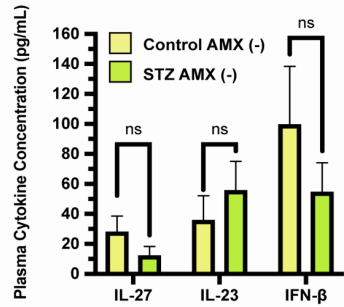

### D Inflammatory Cytokines

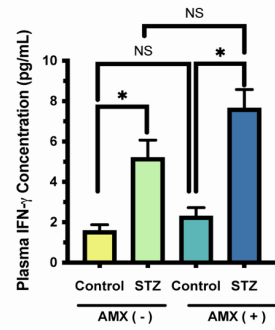

### E GI Histopathology

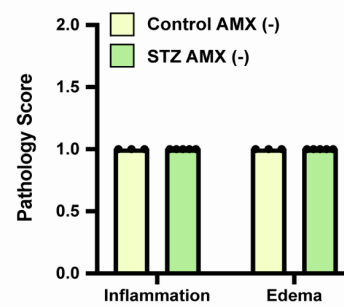

### F Cecal Lipocalin-2

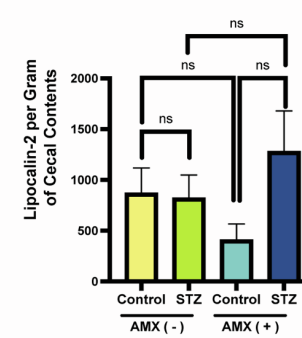

### G 16S Alpha Diversity

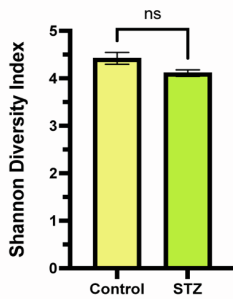

### H 16S Taxonomy (Phylum)

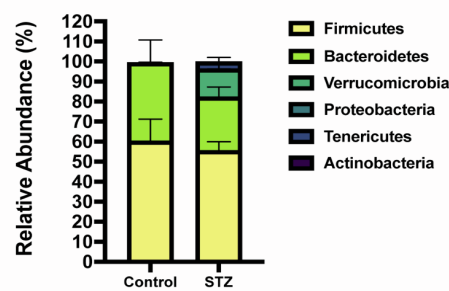

### I 16S Taxonomy (Phylum)

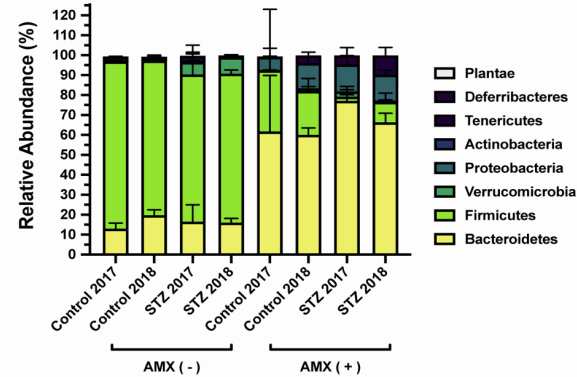

**Figure S1. The impact of streptozotocin treatment on host physiology and microbiome composition without additional. Related to Figure 1.**

- A. Fasting blood glucose of individual mice before STZ injection (Day 0) and on 2 days intervals for up to 14 days post-injection. The Day 14 time-point is representative of the final day of experiments described in Figure 7.
- B. Plasma cytokine concentrations in STZ-treated and control mice 3 days post-injection. Data represent averaged concentrations  $\pm$  SEM for cytokines whose concentration falls between 0 and 23 pg/mL.
- C. Plasma cytokine concentrations in STZ-treated and control mice 3 days post-injection. Data represent averaged concentrations  $\pm$  SEM for cytokines whose concentration falls between 12 and 160 pg/mL.
- D. Plasma concentration of IFN- $\gamma$  in STZ-treated and control mice +/- AMX 4 days after STZ injection.
- E. Pathological assessment of fixed, H&E-stained colon sections 3 days after STZ injection.
- F. Cecal lipocalin-2 concentrations. Data represent average concentrations  $\pm$  SEM.
- G. Alpha diversity as measured by the Shannon diversity index for STZ-treated and control animals 3 days post-injection. Data represent average  $\pm$  SEM.
- H. Phylum-level taxonomic composition of the cecal microbiome 3 days post STZ-injection. Data represent average abundance + SEM.
- I. Phylum-level taxonomic composition of the cecal microbiome in STZ and control mice +/- AMX treatment. Data represent average abundance + SEM.

For A: N = 5 or 6 per group

For B & C: N = 4 per group; \*, P < 0.05; unpaired T-test with Welch's correction

For D & F: N = 4 or 5 per group; \*, P < 0.05; Welch's ANOVA with Dunnett T3 test for multiple hypothesis testing

For E: N = 4 to 6 per group. Inflammation (0: absent, 1: minimal, 2: mild affecting mucosa and sub-mucosa, 3: moderate affecting mucosa, 4: severe). Edema (0: < 10%, 1: 10-25%, 2: 25%-50%, 3: 50%-75%, 4: over 75%).

For G -I: N = 3 to 5 per group; ; \*, P < 0.05; unpaired T-test with Welch's correction

### A Q-TOF-MS Feature Abundance

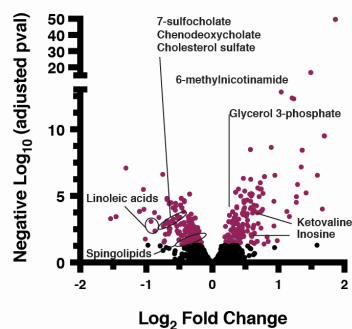

### C LC-MS/MS Annotated Features

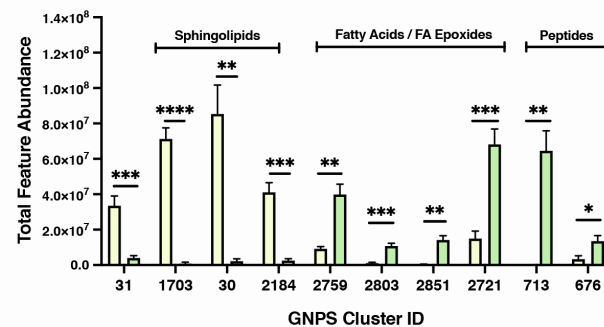

### D CAZyme Transcript Abundance

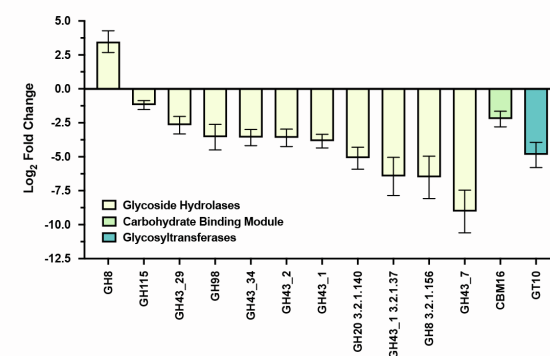

### B Metabolite Pathway Enrichment

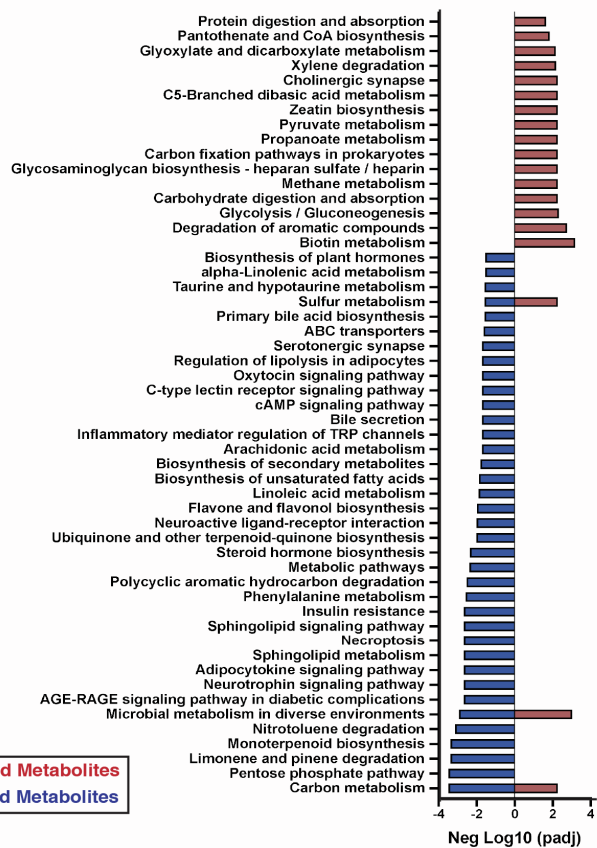

### E Bacteroides thetaioaomicron Gene Expression

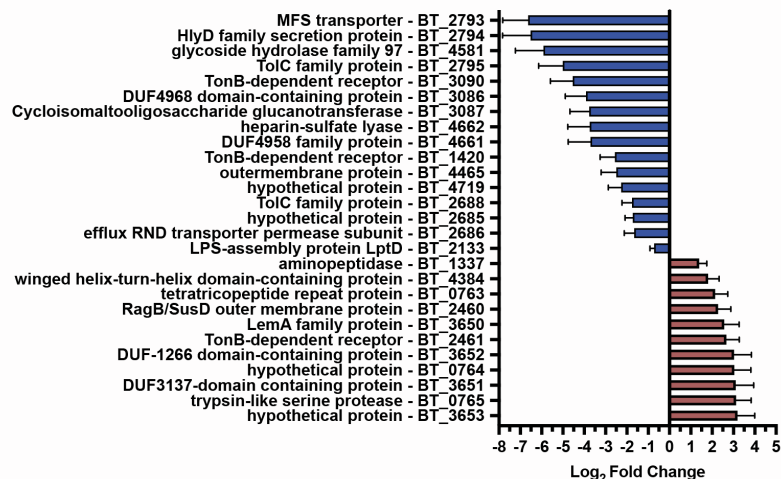

**Figure S2. STZ-induced hyperglycemia modifies both the cecal metabolome and metatranscriptome. Related to Figure 2.**

- A. Volcano plot of the cecal metabolome in STZ-treated mice relative to normoglycemic controls. Purple points represent differentially abundant metabolite features. Metabolites of interest are labeled. See Table S1 for full results (N = 6 per group, 2 technical replicates per mouse)
- B. KEGG pathway enrichment of differentially abundant Q-TOF-MS metabolites in STZ-treated mice compared to controls. Colors indicate whether the metabolites contributing to pathway scoring were enriched (red) or depleted (blue) in STZ-treated animals compared to controls. See Table S3 for full results.
- C. Differentially abundant GNPS-annotated clusters that contain known metabolites within the cluster. Clusters were selected from the top-50 most relevant features via Random Forest Testing. Comparison is between STZ-treated mice and controls. See Table S2 for full results.
- D. Differentially abundant CAZyme transcripts in STZ-treated mice. Data represent log<sub>2</sub> fold change relative to controls  $\pm$  SEM. See Table S4 for full results.
- E. Differentially abundant *B. thetaiotaomicron* transcripts after STZ treatment. Data represent log<sub>2</sub> fold change versus controls  $\pm$  SEM See Table S5 for full results.

For A – C: N = 6 per group, 2 technical replicates per sample

For D & E : N = 4 per group

For A, D, & E: Differentially abundant = Benjamini-Hochberg adjusted p value < 0.05

For B: Significance = unpaired T-test p value < 0.05

For C: \*, P < 0.05; \*\*, P < 0.01; \*\*\*, P < 0.001, \*\*\*\* P < 0.0001; unpaired T-test with Welch's correction

# A Taxonomic Abundance (Species)

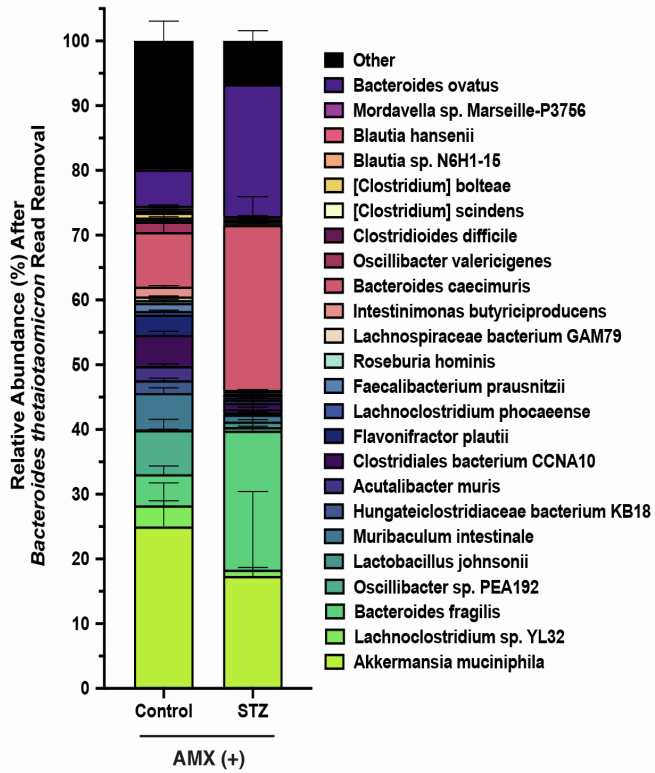

## B *Clostridiales* bacterium CCNA10

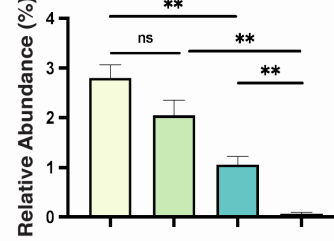

## C *Muribaculum intestinale*

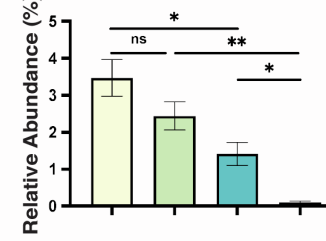

## D *Acutalibacter muris*

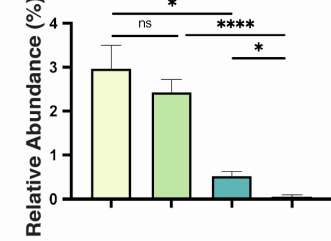

## E *Flavonifractor plautii*

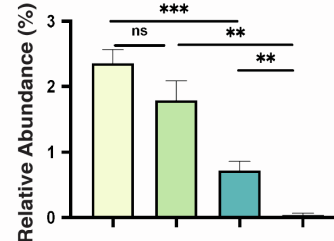

## F *Hungateiclostridiaceae* KB18

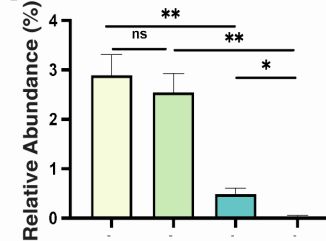

## G *Intestinimonas butyriciproducens*

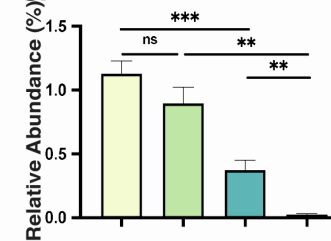

## H *Oscillibacter* sp. PEA192

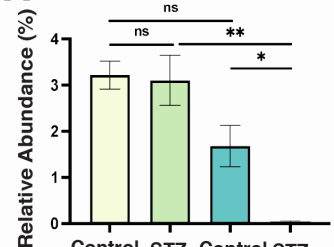

## I *Oscillibacter valericigenes*

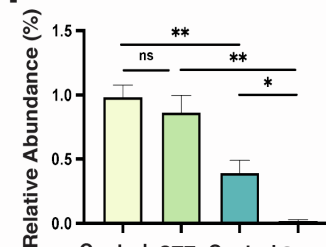

## J *Akkermansia muciniphila*

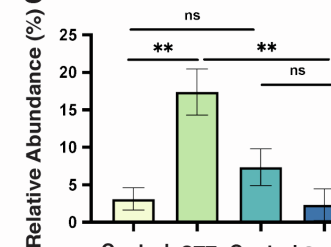

**Figure S3. Streptozotocin impacts taxonomic composition after Amoxicillin treatment. Related to Figure 3.**

- A. Average relative abundance of species from A after the removal of reads assigned to *B. thetaiotaomicron*. Data are represented as mean  $\pm$  SEM for each species
- B. Average relative abundance of reads assigned to *Clostridiales* bacterium CCNA10.
- C. Average relative abundance of reads assigned to *Muribaculum intestinale*.
- D. Average relative abundance of reads assigned to *Acutalibacter muris*.
- E. Average relative abundance of reads assigned to *Flavonifractor plautii*.
- F. Average relative abundance of reads assigned to *Hungateiclostrideaceae* bacterium KB18.
- G. Average relative abundance of reads assigned to *Intestinimonas butyriciproducens*.
- H. Average relative abundance of reads assigned to *Oscillibacter* species PEA192.
- I. Average relative abundance of reads assigned to *Oscillibacter valericigenes*
- J. Average relative abundance of reads assigned to *Akkermansia muciniphila*.

For all panels: N = 5 to 8 per group

For panels B-J, (\*, P < 0.05; \*\*, P < 0.01; \*\*\*, P < 0.001; \*\*\*\*, P < 0.0001, Welch's ANOVA with Dunnett T3 test for multiple hypothesis testing).

### A SEED Transcript Abundance after Amoxicillin (Control)

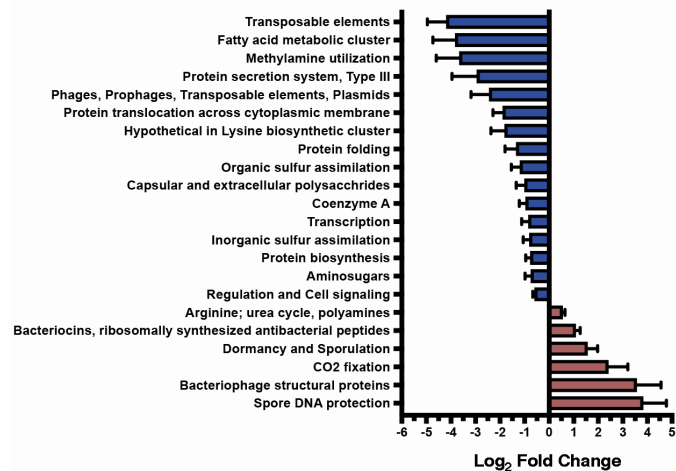

### B SEED Transcript Abundance after Amoxicillin (STZ)

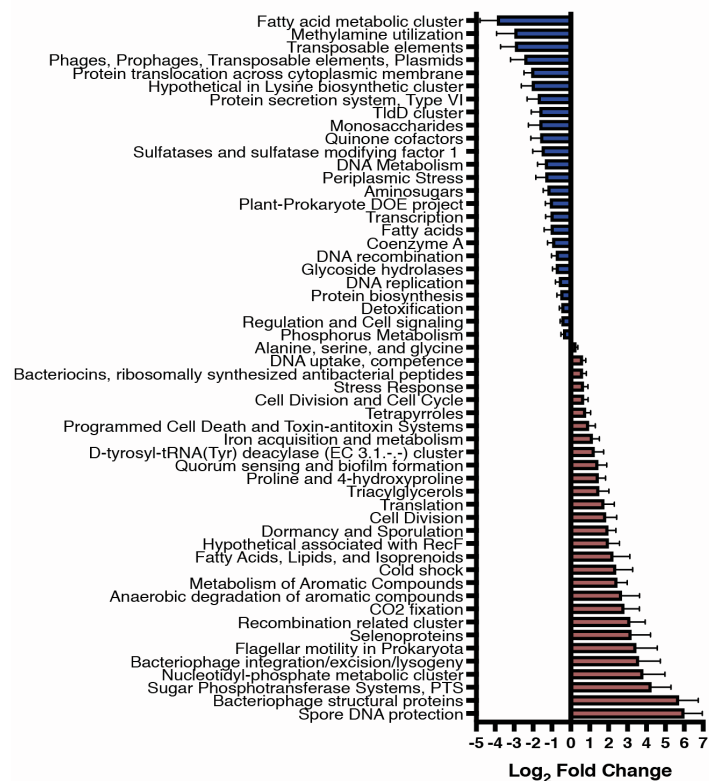

### C LCMS/MS Annotated Features from Top50 Random Forest Hits

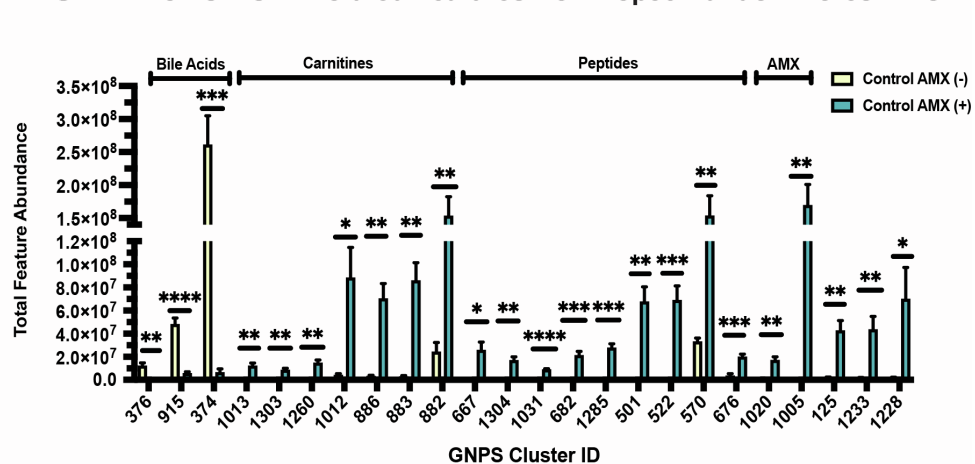

### D LCMS/MS Annotated Features from Top50 Random Forest Hits

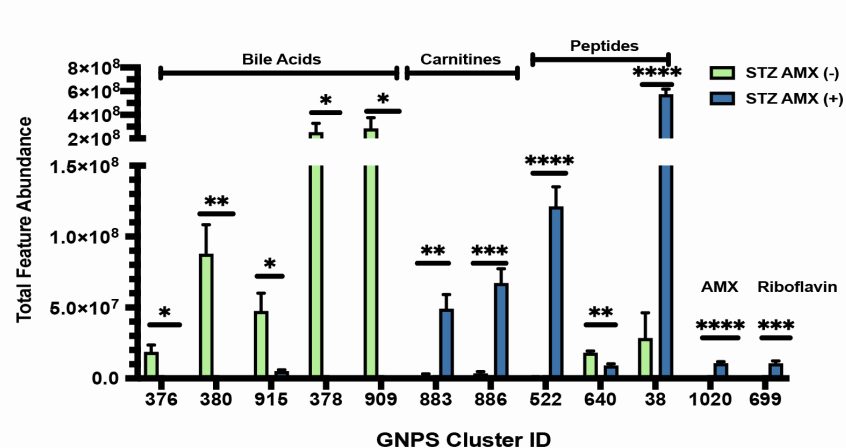



**Figure S4: Streptozotocin modifies the metatranscriptomic and metabolomic responses of the gut microbiome to amoxicillin. Related to Figures 4 & 5.**

- A. Differentially abundant level 2 SEED Subsystem transcripts in normoglycemic control mice after AMX treatment. Data represent  $\log_2$  fold change relative to vehicle controls  $\pm$  SEM. See Table S7 for full results.
- B. Differentially abundant level 2 SEED Subsystem transcripts in STZ-treated mice after AMX treatment. Data represent  $\log_2$  fold change relative to vehicle controls  $\pm$  SEM. See Table S7 for full results.
- C. Differentially abundant GNPS-annotated clusters that contain known metabolites within the cluster. Clusters were selected from the top-50 most relevant features via Random Forest Testing. Comparison is between AMX-treated mice and vehicle-treated mice for normoglycemic controls. See Table S2 for full results.
- D. Differentially abundant GNPS-annotated clusters that contain known metabolites within the cluster. Clusters were selected from the top-50 most relevant features via Random Forest Testing. Comparison is between AMX-treated mice and vehicle-treated mice for STZ-treated mice. See Table S2 for full results.

For A & B: N = 4 per group; Differentially abundant = Benjamini-Hochberg adjusted p value < 0.05

For C & D: N = 6 per group, 2 technical replicates per sample; (\*, P < 0.05; \*\*, P < 0.01; \*\*\*, P < 0.001, \*\*\*\* P < 0.0001); unpaired T-test with Welch's correction

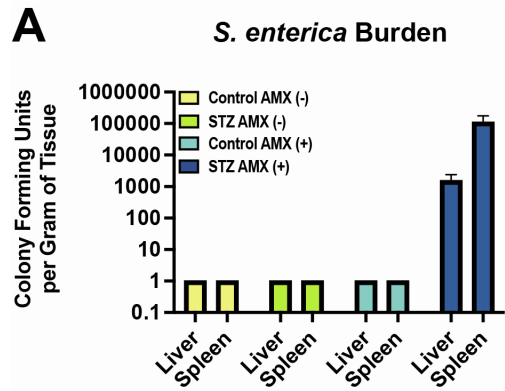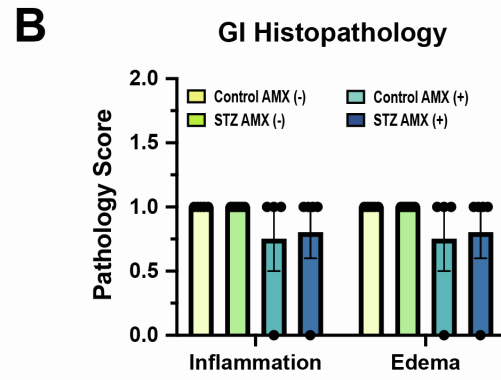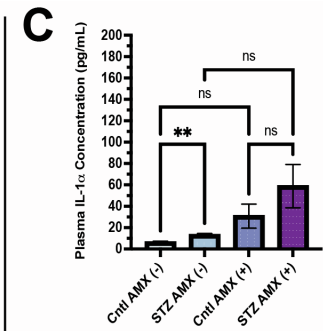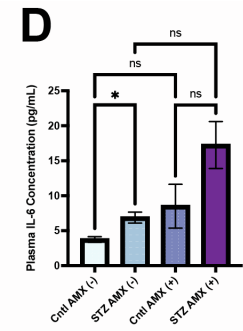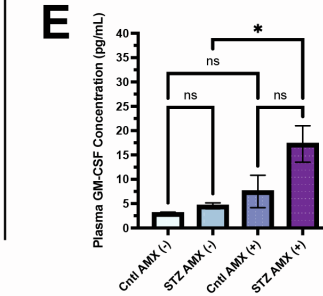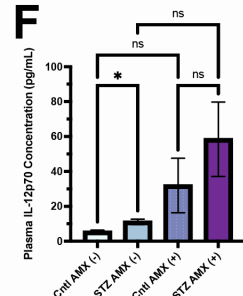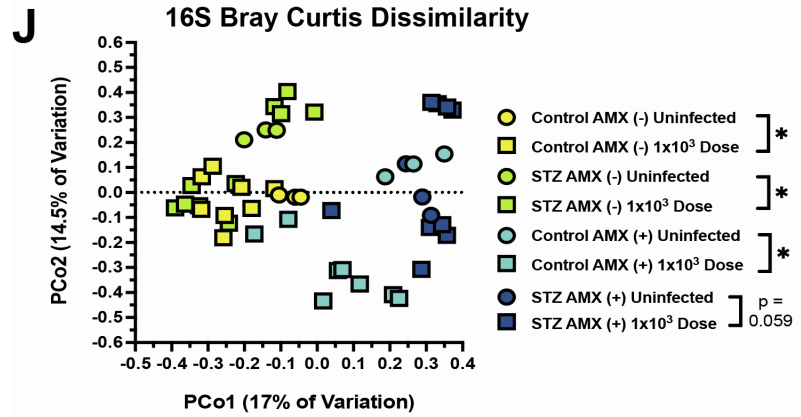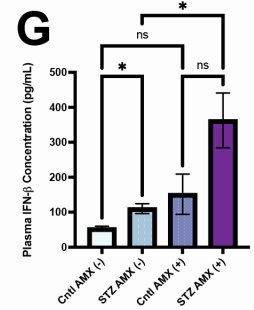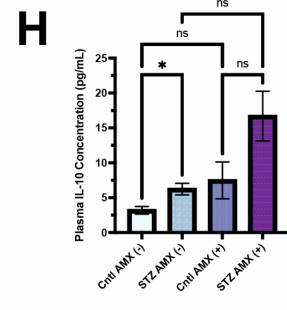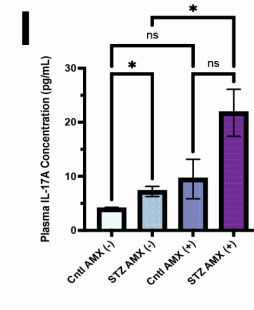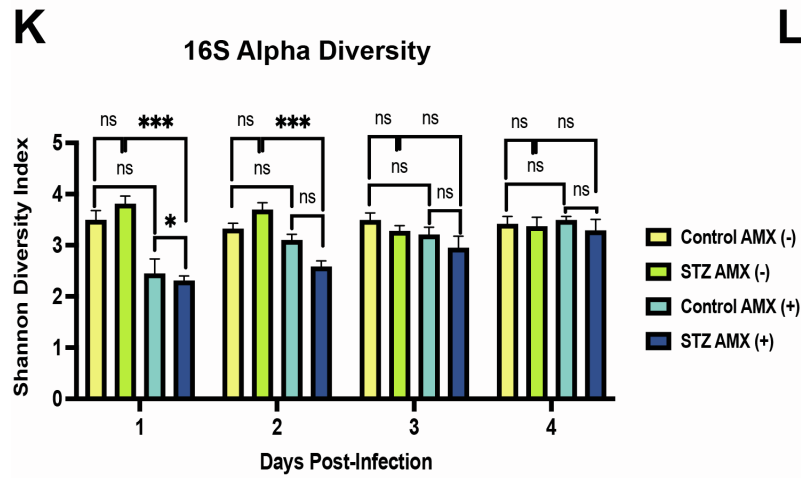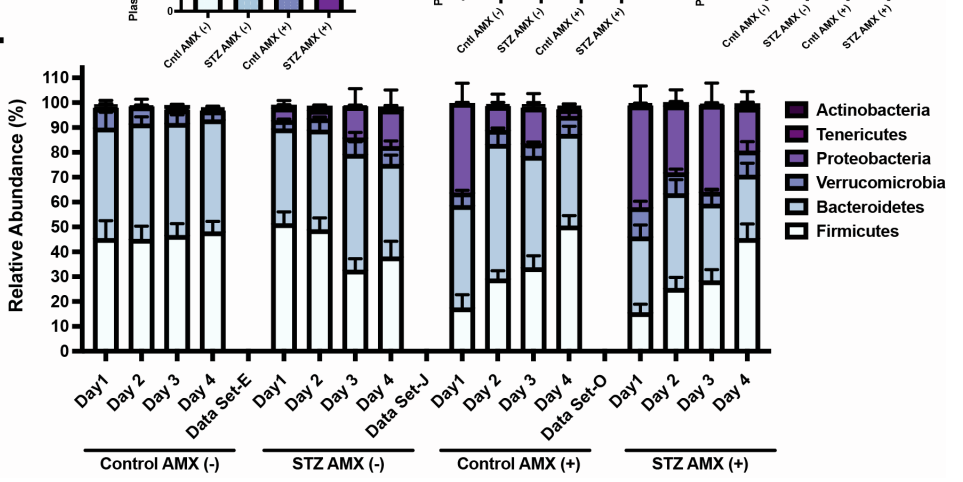

**Figure S5: STZ and amoxicillin dual treatment worsens outcomes during *Salmonella enterica* infection. Related to Figure 7.**

- A. *Salmonella enterica* Typhimurium colony forming units (CFU) per gram of hepatic and splenic tissue in control AMX(+/-), and hyperglycemic AMX(+/-) mice over the course of infection with an inoculum of  $1 \times 10^3$  cells. Data represent mean CFU  $\pm$  SEM.
- B. Pathological assessment of fixed, H&E-stained colon sections 4 days after infection with an inoculum of  $1 \times 10^3$  cells.
- C. Plasma concentration of IL-1 $\alpha$  in STZ-treated and control mice +/- AMX
- D. Plasma concentration of IL-6 in STZ-treated and control mice +/- AMX
- E. Plasma concentration of GM-CSF in STZ-treated and control mice +/- AMX
- F. Plasma concentration of IL-12p70 in STZ-treated and control mice +/- AMX
- G. Plasma concentration of IFN- $\beta$  in STZ-treated and control mice +/- AMX
- H. Plasma concentration of IL-10 in STZ-treated and control mice +/- AMX
- I. Plasma concentration of IL-17A in STZ-treated and control mice +/- AMX
- J. Principal Coordinates Analysis of Bray-Curtis Dissimilarity between uninfected controls and mice infected with an inoculum of  $1 \times 10^3$  cells 24 hours post-infection.
- K. Alpha diversity as measured by the Shannon diversity index of fecal 16S rRNA reads. Data represent average score  $\pm$  SEM during infection time course after dosage with an inoculum of  $1 \times 10^3$  cells.
- L. Phylum-level taxonomic composition of the fecal microbiome during infection time course after dosage with an inoculum of  $1 \times 10^3$  cells. Data represent average abundance  $\pm$  SEM.

For A - I: N = 4 to 7 per group

For J: N = 3 to 10 per group

For B: Inflammation (0: absent, 1: minimal, 2: mild affecting mucosa and sub-mucosa, 3: moderate affecting mucosa, 4: severe). Edema (0: < 10%, 1: 10-25%, 2: 25%-50%, 3: 50%-75%, 4: over 75%).

For C - I: (\*, P < 0.05; \*\*, P < 0.01; \*\*\*, P < 0.001; \*\*\*\*, P < 0.0001; Welch's ANOVA with Dunnet T3 test for multiple hypothesis testing).

For J: (\*, P < 0.05; \*\*, P < 0.01; \*\*\*, P < 0.001; permutational ANOVA)

For K: (\*, P < 0.05; \*\*, P < 0.01; \*\*\*, P < 0.001; \*\*\*\*, P < 0.0001; Welch's ANOVA with Dunnet T3 test for multiple hypothesis testing)
